# Supplementary material
Source: PubMed Central journal article supplement (PMC3911325)
Supplement: JCM.02433-13_zjm999093153so1.pdf [file JCM.02433-13_zjm999093153so1.pdf]

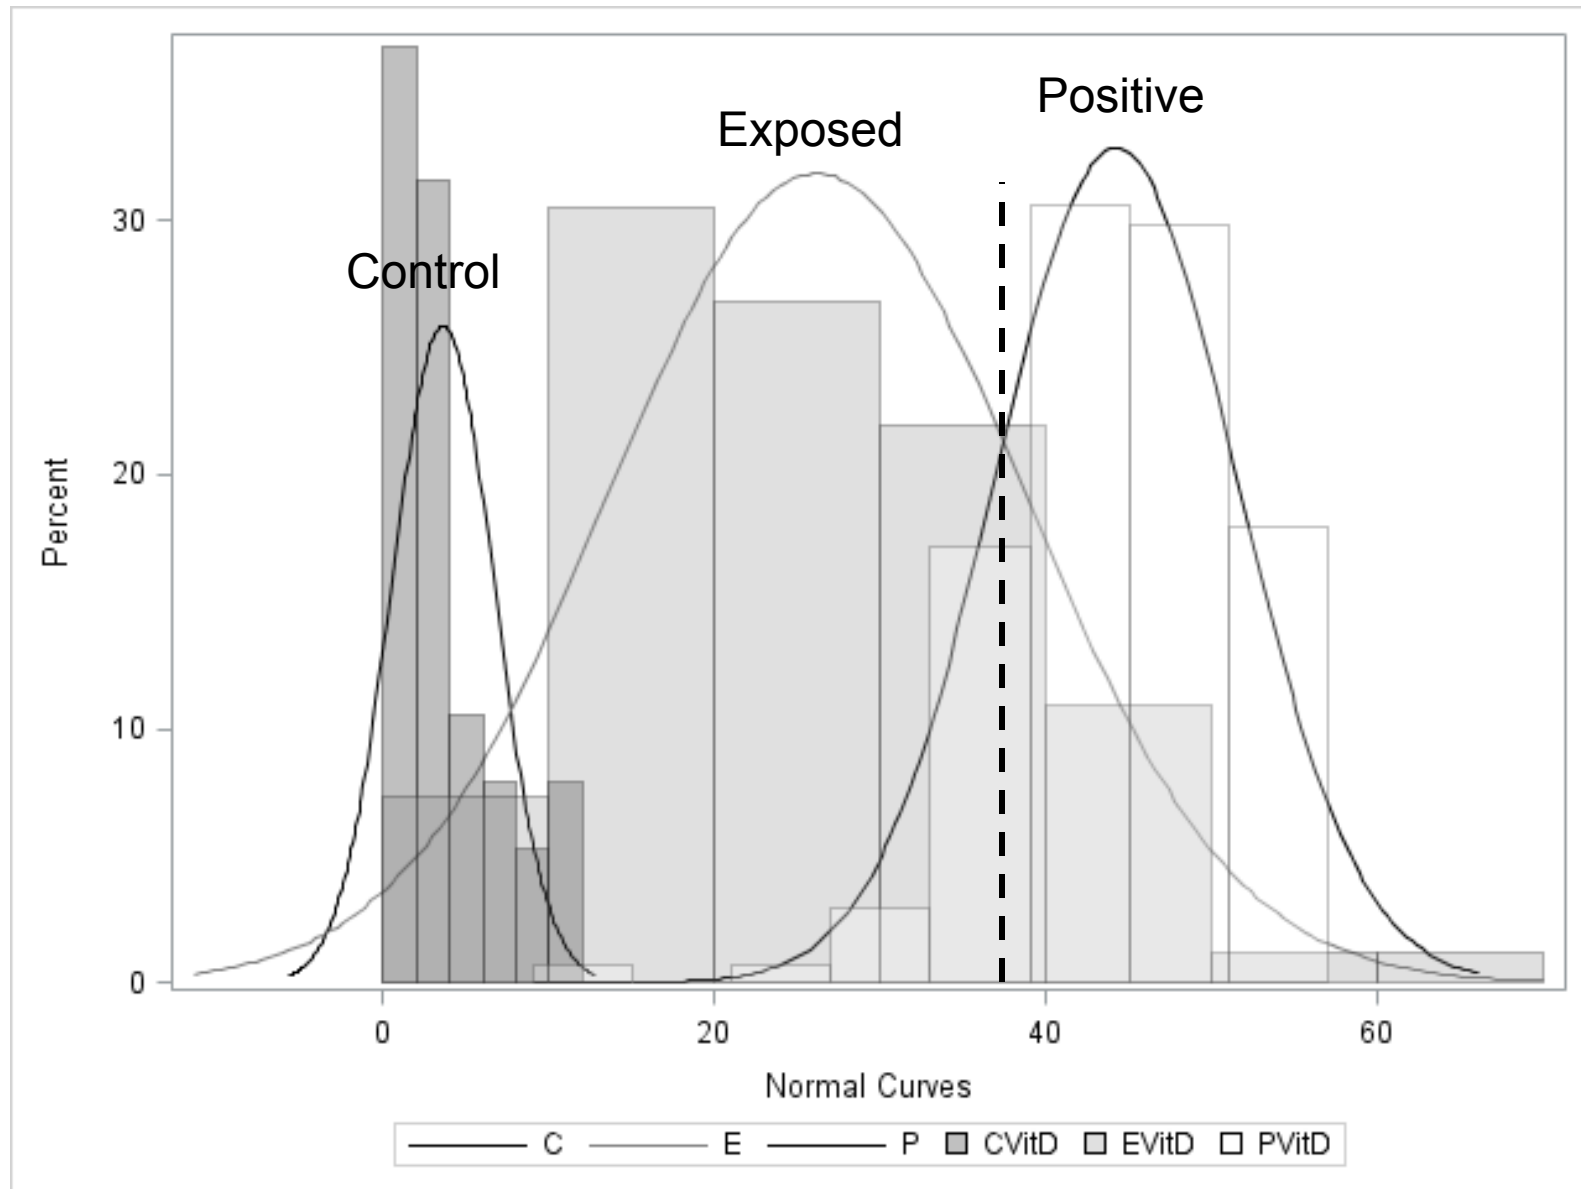

Vitamin D Binding Protein

### ROC Curves for Comparisons

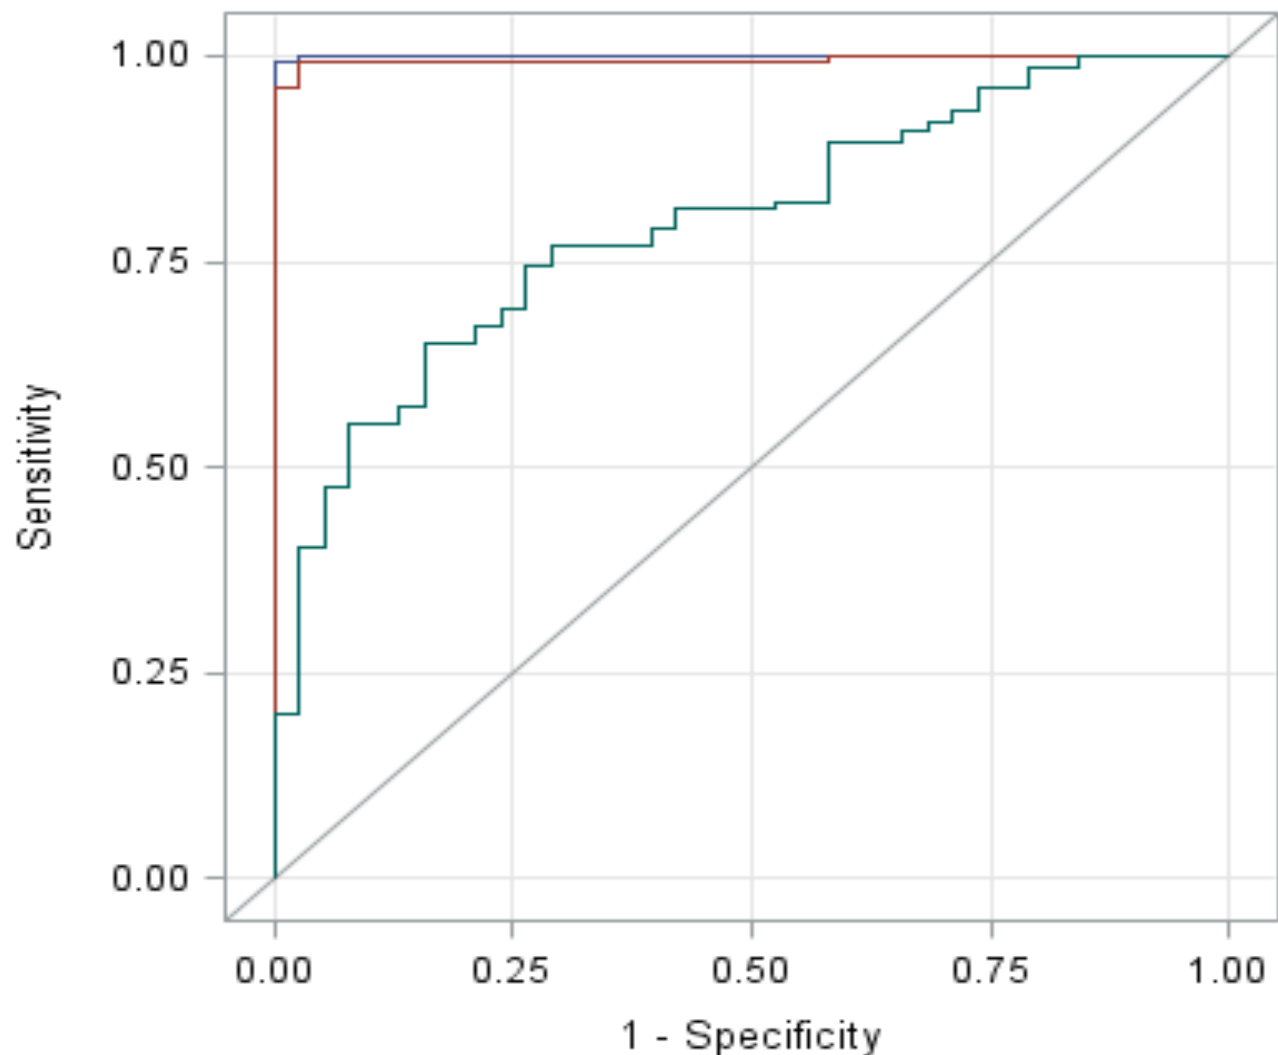

ROC Curve (Area)

- Vitamin D binding protein (0.9998)
- Fetuin (0.9949)
- Alpha antitrypsin (0.7967)

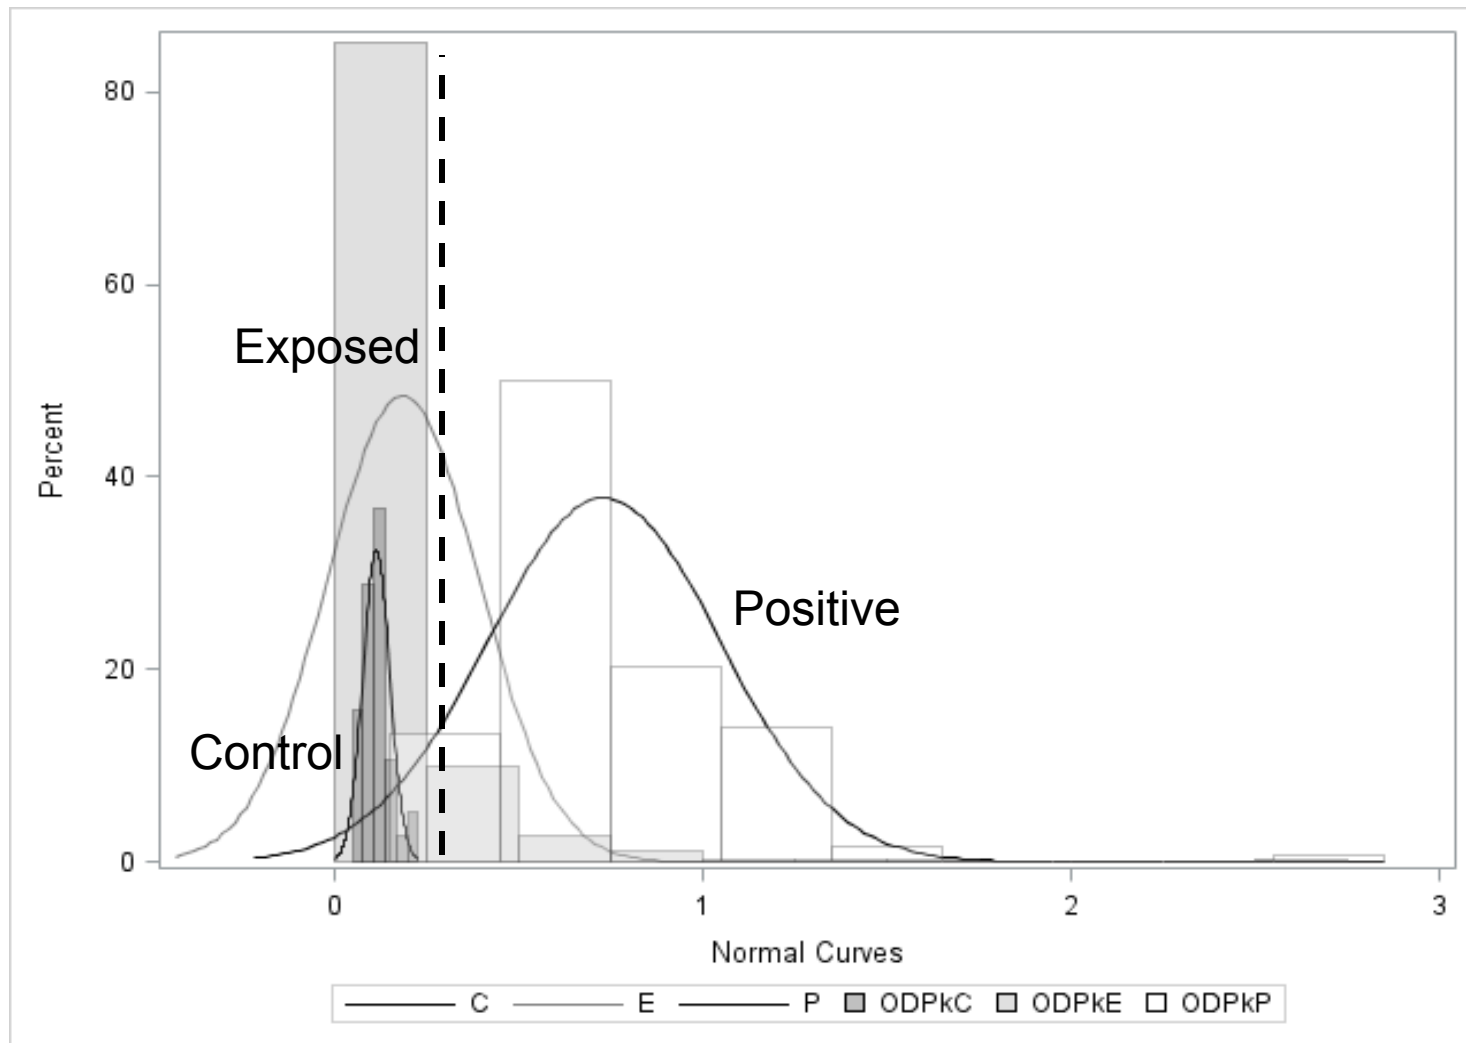

Pks5

### ROC Curves for Comparisons

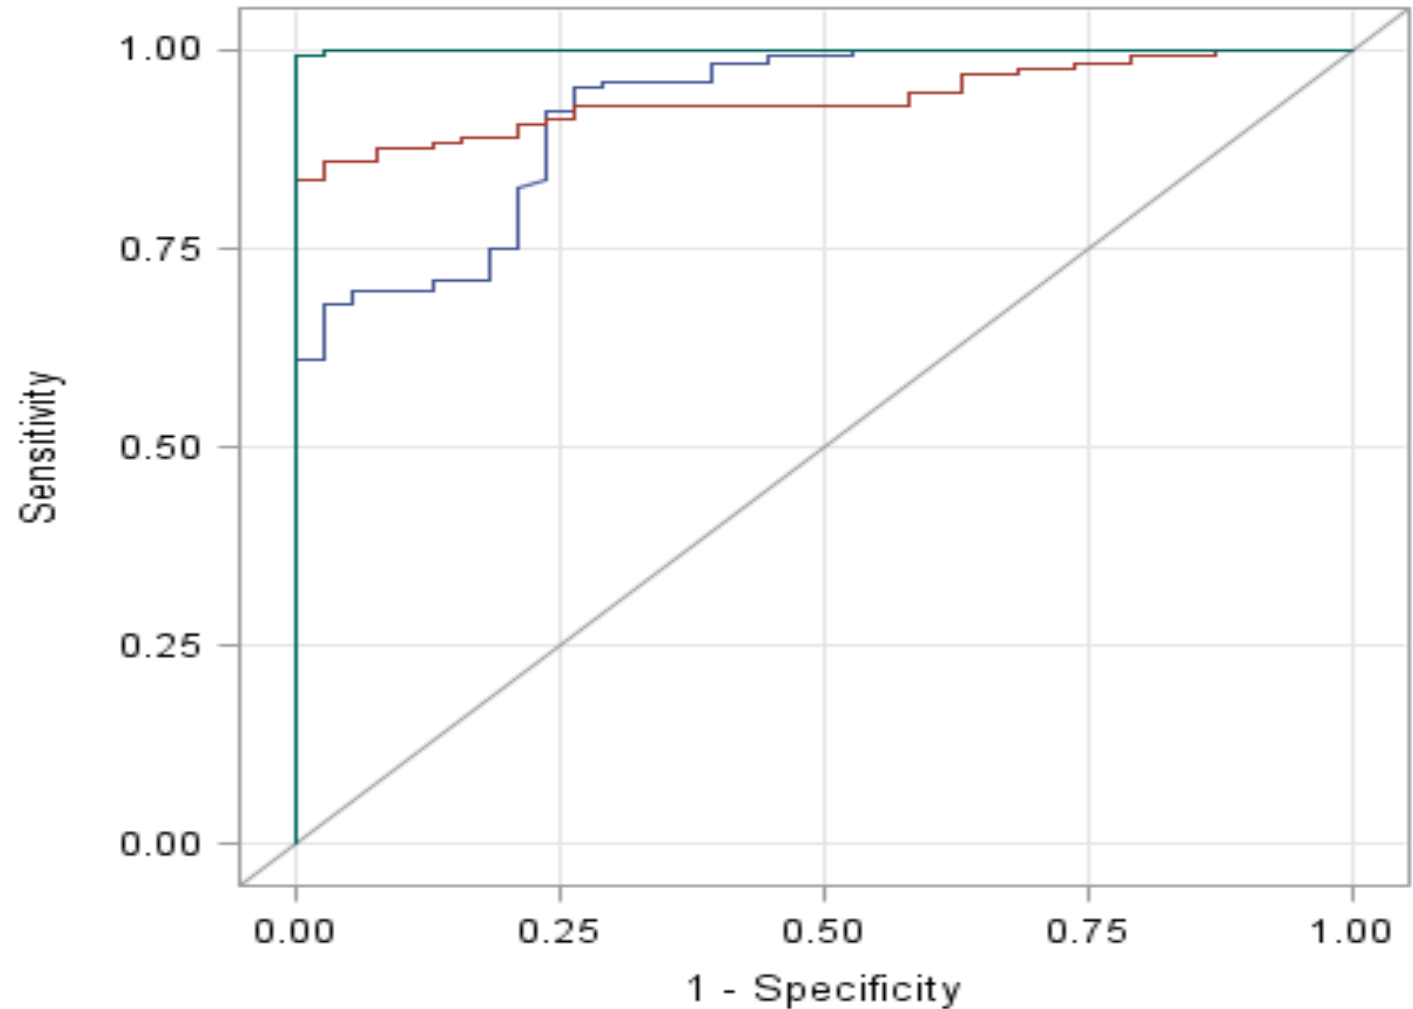

ROC Curve (Area)

|                  |                  |
|------------------|------------------|
| Mb2515c (0.9222) | MN1895c (0.9387) |
| Pks5 (0.9998)    |                  |

## Pks5 Cutoffs Based on Sensitivity and Specificity

| Obs      | CUTOFF     | TEST     | Status   | COUNT      | PERCENT        | PCT_ROW        | TP_RATE        | FP_RATE      | Se             | Sp             |
|----------|------------|----------|----------|------------|----------------|----------------|----------------|--------------|----------------|----------------|
| 1        | 0.0        | R        | C        | 38         | 22.8916        | 22.892         | 100.000        | 100.000      | 100.000        | 0.000          |
| 2        | 0.1        | R        | C        | 23         | 13.8554        | 15.232         | 100.000        | 60.526       | 100.000        | 39.474         |
| <b>3</b> | <b>0.2</b> | <b>R</b> | <b>C</b> | <b>2</b>   | <b>1.2048</b>  | <b>1.538</b>   | <b>100.000</b> | <b>5.263</b> | <b>100.000</b> | <b>94.737</b>  |
| <b>4</b> | <b>0.3</b> | <b>R</b> | <b>P</b> | <b>127</b> | <b>76.5060</b> | <b>100.000</b> | <b>99.219</b>  | <b>0.000</b> | <b>99.219</b>  | <b>100.000</b> |
| <b>5</b> | <b>0.4</b> | <b>R</b> | <b>P</b> | <b>118</b> | <b>71.0843</b> | <b>100.000</b> | <b>92.188</b>  | <b>0.000</b> | <b>92.188</b>  | <b>100.000</b> |
| 6        | 0.5        | R        | P        | 101        | 60.8434        | 100.000        | 78.906         | 0.000        | 78.906         | 100.000        |

Obs = Number of observations

TP\_Rate = True Positive Rate

FP\_Rate = False Positive Rate

Se = Sensitivity

Sp = Specificity

# Pks5 Cutoffs Based on Sensitivity and Specificity

| Obs      | CUTOFF     | TEST     | Status   | COUNT      | PERCENT        | PCT_ROW        | TP_RATE        | FP_RATE       | Se             | Sp             |
|----------|------------|----------|----------|------------|----------------|----------------|----------------|---------------|----------------|----------------|
| 1        | 0.0        | R        | E        | 424        | 76.8116        | 76.8116        | 100.000        | 100.000       | 100.000        | 0.0000         |
| 2        | 0.1        | R        | E        | 311        | 56.3406        | 70.8428        | 100.000        | 73.349        | 100.000        | 26.6509        |
| <b>3</b> | <b>0.2</b> | <b>R</b> | <b>E</b> | <b>104</b> | <b>18.8406</b> | <b>44.8276</b> | <b>100.000</b> | <b>24.528</b> | <b>100.000</b> | <b>75.4717</b> |
| <b>4</b> | <b>0.3</b> | <b>R</b> | <b>E</b> | <b>42</b>  | <b>7.6087</b>  | <b>24.8521</b> | <b>99.219</b>  | <b>9.906</b>  | <b>99.219</b>  | <b>90.0943</b> |
| <b>5</b> | <b>0.4</b> | <b>R</b> | <b>E</b> | <b>29</b>  | <b>5.2536</b>  | <b>19.7279</b> | <b>92.188</b>  | <b>6.840</b>  | <b>92.188</b>  | <b>93.1604</b> |
| <b>6</b> | <b>0.5</b> | <b>R</b> | <b>E</b> | <b>21</b>  | <b>3.8043</b>  | <b>17.2131</b> | <b>78.906</b>  | <b>4.953</b>  | <b>78.906</b>  | <b>95.0472</b> |
| 7        | 0.6        | R        | E        | 13         | 2.3551         | 14.7727        | 58.594         | 3.066         | 58.594         | 96.9340        |
| 8        | 0.7        | R        | E        | 10         | 1.8116         | 14.9254        | 44.531         | 2.358         | 44.531         | 97.6415        |
| 9        | 0.8        | R        | E        | 8          | 1.4493         | 17.0213        | 30.469         | 1.887         | 30.469         | 98.1132        |
| 10       | 0.9        | R        | E        | 6          | 1.0870         | 17.1429        | 22.656         | 1.415         | 22.656         | 98.5849        |
| 11       | 1.0        | R        | E        | 4          | 0.7246         | 15.3846        | 17.188         | 0.943         | 17.188         | 99.0566        |
| 12       | 1.1        | R        | E        | 4          | 0.7246         | 20.0000        | 12.500         | 0.943         | 12.500         | 99.0566        |
| 13       | 1.2        | R        | E        | 3          | 0.5435         | 25.0000        | 7.031          | 0.708         | 7.031          | 99.2925        |
| 14       | 1.3        | R        | E        | 3          | 0.5435         | 37.5000        | 3.906          | 0.708         | 3.906          | 99.2925        |

Obs = Number of observations  
 TP\_Rate = True Positive Rate  
 FP\_Rate = False Positive Rate  
 Se = Sensitivity  
 Sp = Specificity

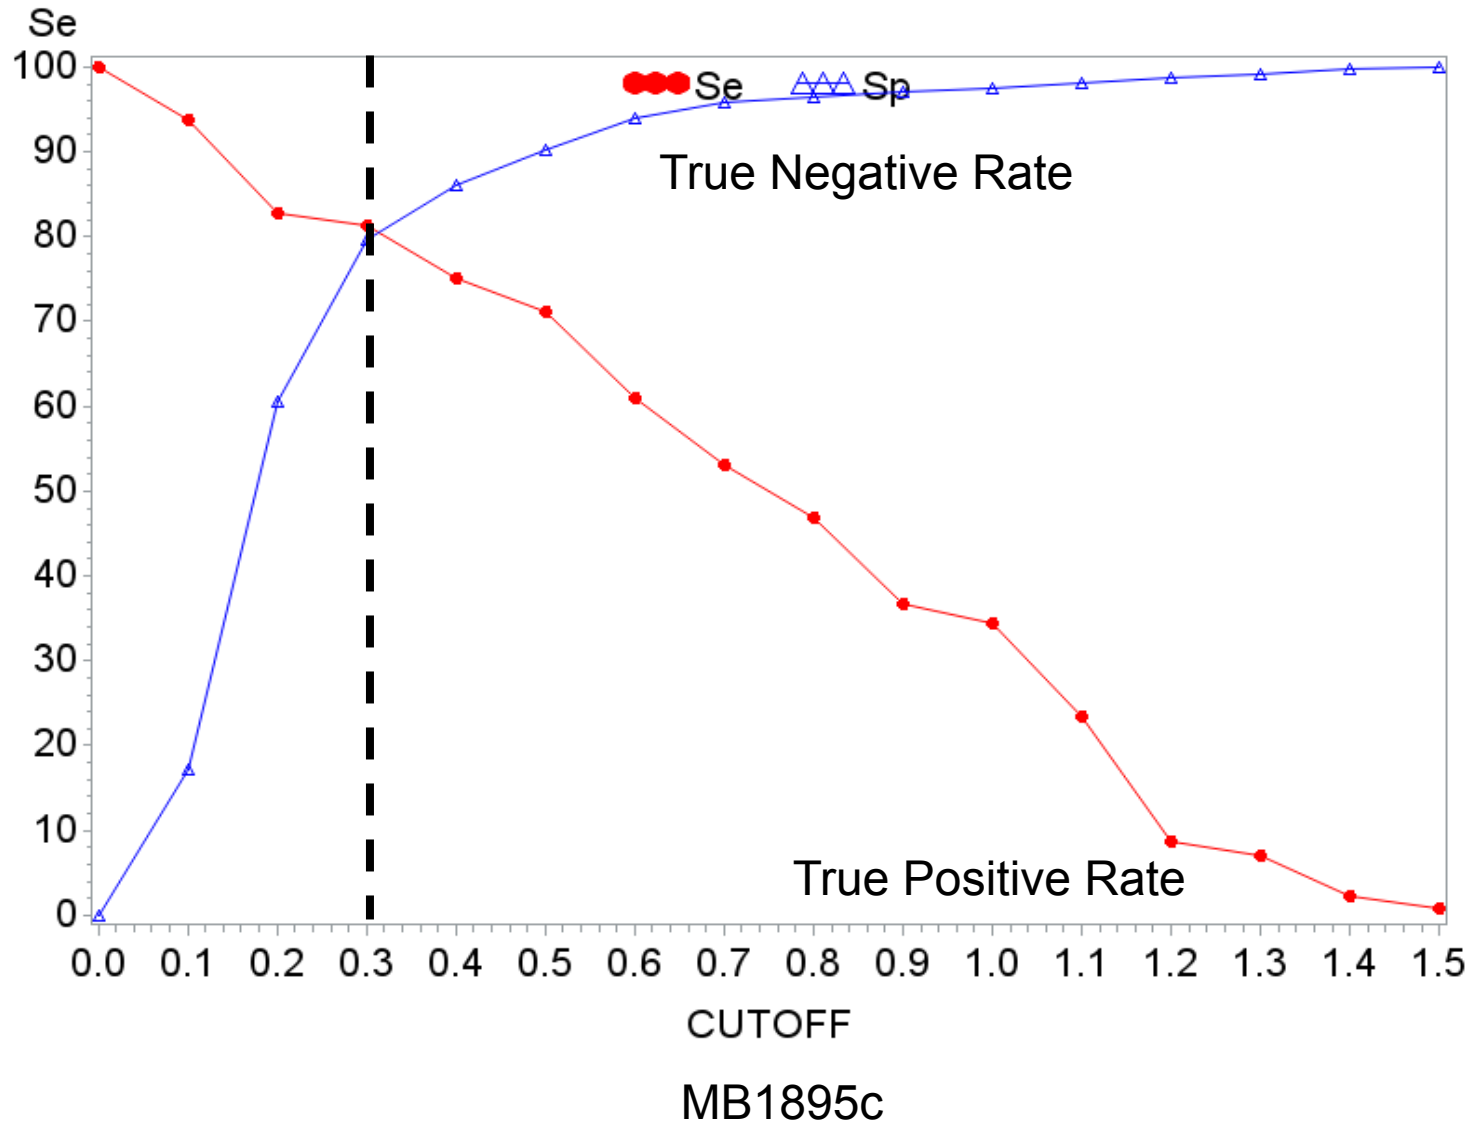

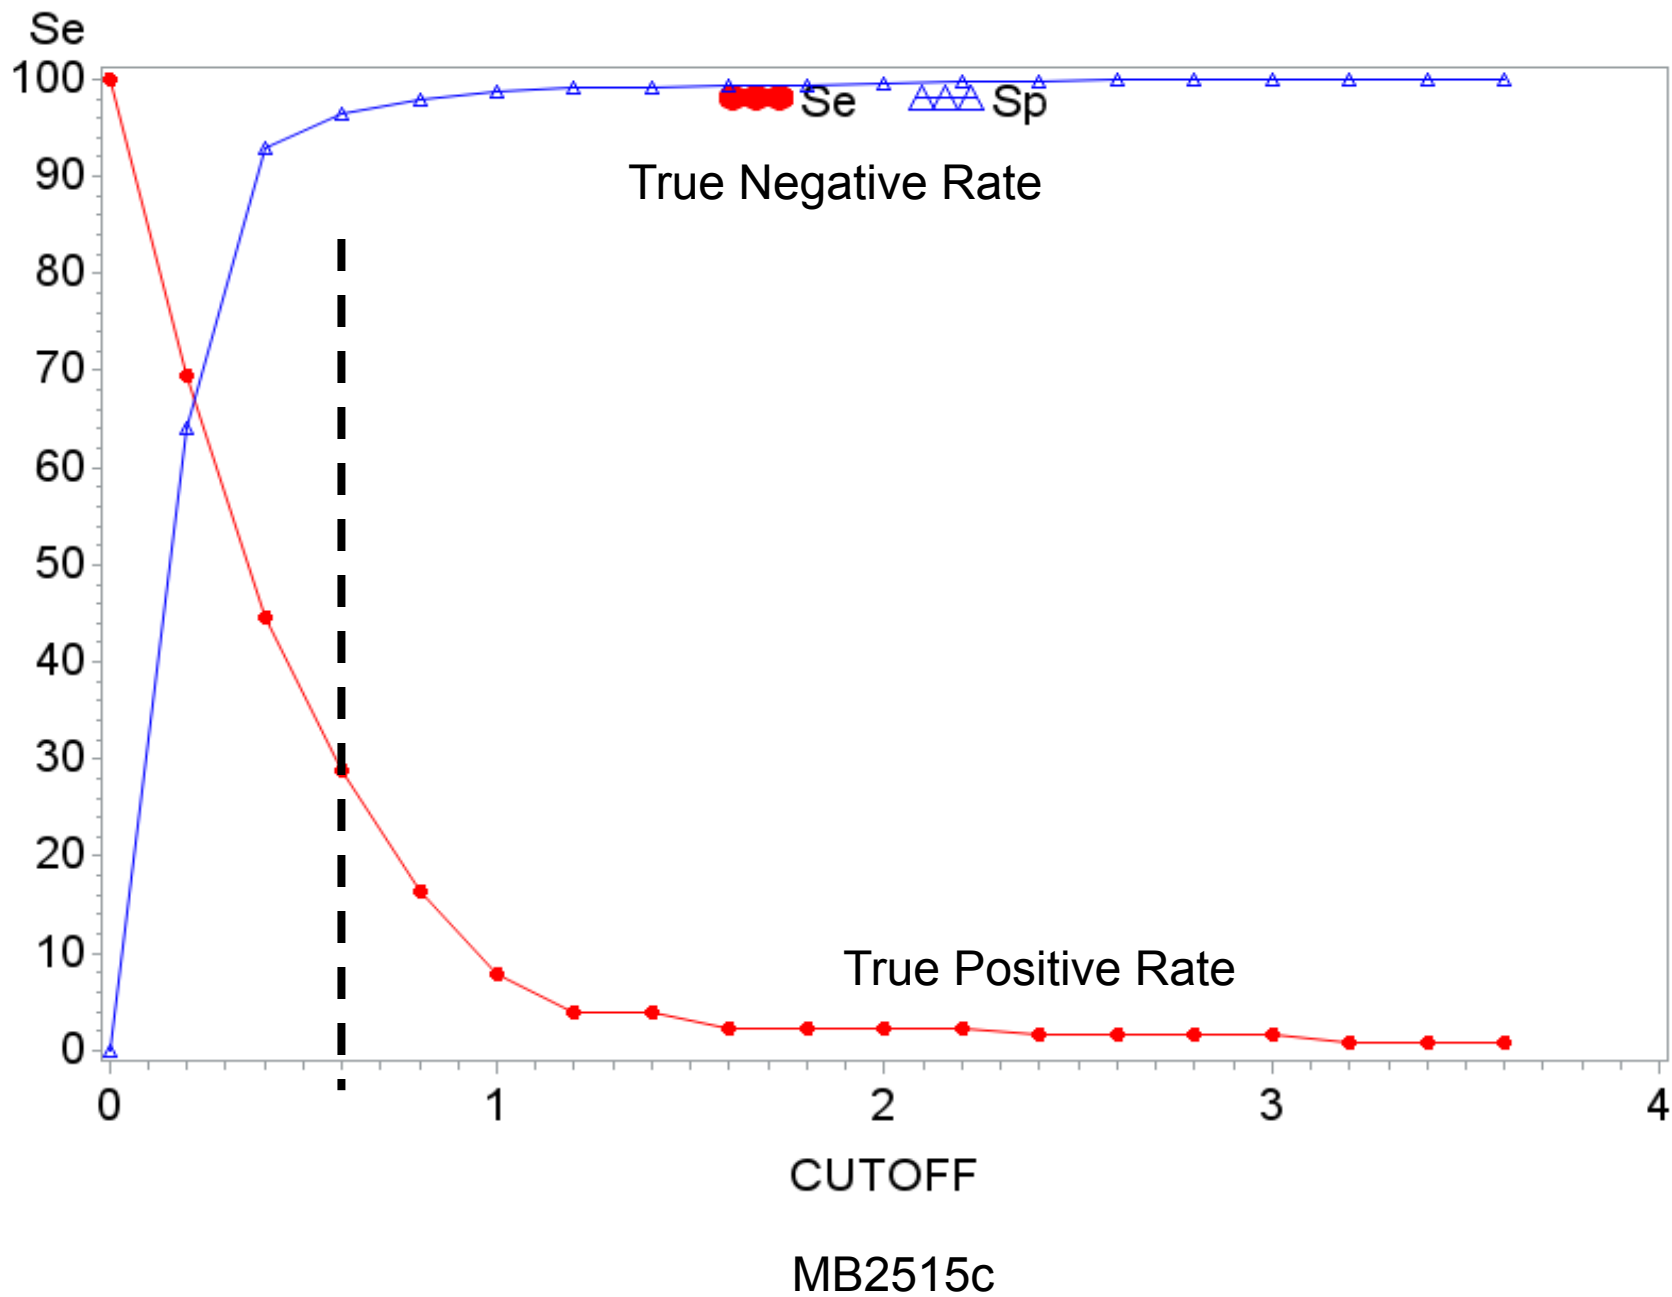



1 **Supplemental Figures:**

2 **Figure S1: Vitamin D binding protein (VDBP) histogram.**

3 Relative densities were collected from negative control (n=38), negative bTB exposed (n  
4 = 82) and infected (n = 128) animals. Cutoff value (38.50) was determined based on  
5 ROC analysis and true negative rate vs. true positive rate. Control, positive and exposed  
6 groups showed clear separation.

7

8 **Figure S2: Receiver Operating Characteristic (ROC) curves for host biomarkers.**

9 Each point on ROC curves is the fraction of bTB positive cattle (true-positive rate) versus  
10 the corresponding fraction of negative controls (false-positive rate). VDBP and fetuin-A  
11 are the most reliable biomarkers (AUC = 0.9998 and 0.9949, respectively) and alpha-1  
12 antitrypsin is a moderately reliable biomarker (AUC = 0.7967). VDBP = blue line,  
13 fetuin-A = red line, and alpha-1 antitrypsin = green line.

14

15 **Figure S3: Polyketide synthetase 5 (Pks5) histogram.**

16 Relative densities were collected from negative controls (n = 38), negative bTB exposed  
17 (n = 428) and infected (n = 128) animals. Cutoff value (0.4 nm) was determined based  
18 on ROC analysis and true negative rate vs. true positive rate.

19

20 **Figure S4: Receiver Operating Characteristic (ROC) curves for pathogen**  
21 **biomarkers.**

22 Each point on ROC curves is the fraction of bTB positive cattle (true-positive rate) versus  
23 the corresponding fraction of negative controls (false-positive rate). Pks5, MB2515c, and

24 MB1895c are all reliable biomarkers (AUC = 0.9998, 0.9222, and 0.9387, respectively).

25 Pks5 = green line, MB1895c = red line, and MB2515c = blue line.

26

27 **Figure S5: Pks5 cutoffs based on sensitivity and specificity.**

28 The true negative rate and true positive rate using Pks5 as a biomarker were plotted

29 against each other. Cutoff values ranging from 0.2-0.5 nm may be used in field

30 applications dependent upon bTB prevalence.

31

32 **Figure S6: Pks5 cutoffs based on sensitivity and specificity comparing negative**  
33 **controls and bTB infected animals.**

34 The true negative rate and true positive rate using Pks5 as a biomarker were plotted

35 against each other. Cutoff values ranging from 0.2-0.4 nm provided maximum sensitivity

36 and specificity.

37

38 **Figure S7: MB1895c distinguished bovine tuberculosis positive and negative**

39 **exposed animals.** The true negative rate and true positive rate using MB1895c as a

40 biomarker were plotted against each other. The optimal cutoff value corresponded to 0.3

41 nm. Cutoff value corresponds to a sensitivity of 81.250% and specificity of 79.717%.

42

43 **Figure S8: MB2515c is a moderately reliable biomarker for bovine tuberculosis.**

44 The true negative rate and true positive rate using MB2515c as a biomarker were plotted

45 against each other. The optimal cutoff value corresponded to 0.2 nm. Cutoff value

46 corresponds to a sensitivity of 69.531% and specificity of 64.151%
